# Supplementary material for: Controlled formation of ball-milled carbon quantum dots via optimized graphite structures by numerical simulation
Source: Royal Society of Chemistry journal article supplement (doi:10.1039/d4nj01333f), 2024-01-01
Supplement: d4nj01333f1.pdf [file d4nj01333f1.pdf]

**Controlled formation of ball-milled carbon quantum dots via optimized graphite structures  
by numerical simulation**

Sonia Lu Tai,<sup>1</sup> Kelly Qi Wang,<sup>1</sup> Ryan Taoran Wang,<sup>2,\*</sup> Gu Xu,<sup>1</sup> Alex Fan Xu,<sup>3,\*</sup>

<sup>1</sup> Department of Materials Science and Engineering, McMaster University, 1280 Main St. W,  
Hamilton, ON L8S 4L8, Canada

<sup>2</sup> Energy Materials and Optoelectronics Unit, Songshan Lake Materials Laboratory, China  
Academy of Sciences, Dongguan 523808, China

<sup>3</sup> State Key Laboratory for Artificial Microstructure and Mesoscopic Physics, School of Physics,  
Frontiers Science Center for Nano-optoelectronics, Collaborative Innovation Center of Quantum  
Matter, Peking University, Beijing 100871, China

\*Correspondence: wangtaoran@sslslab.org.cn; xufan@pku.edu.cn

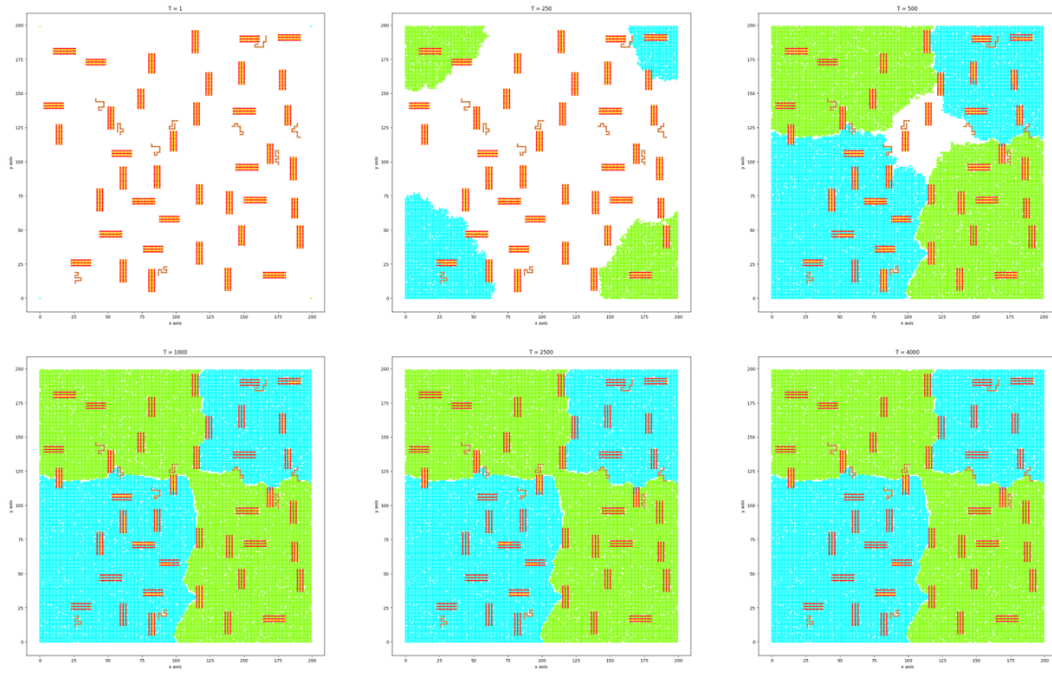

**Figure S1.** The simulation results of coal particles with layer number  $n=5$  under shear stresses at iteration number  $T$  of 1, 250, 1000, 1000, 2500, 4000, respectively.

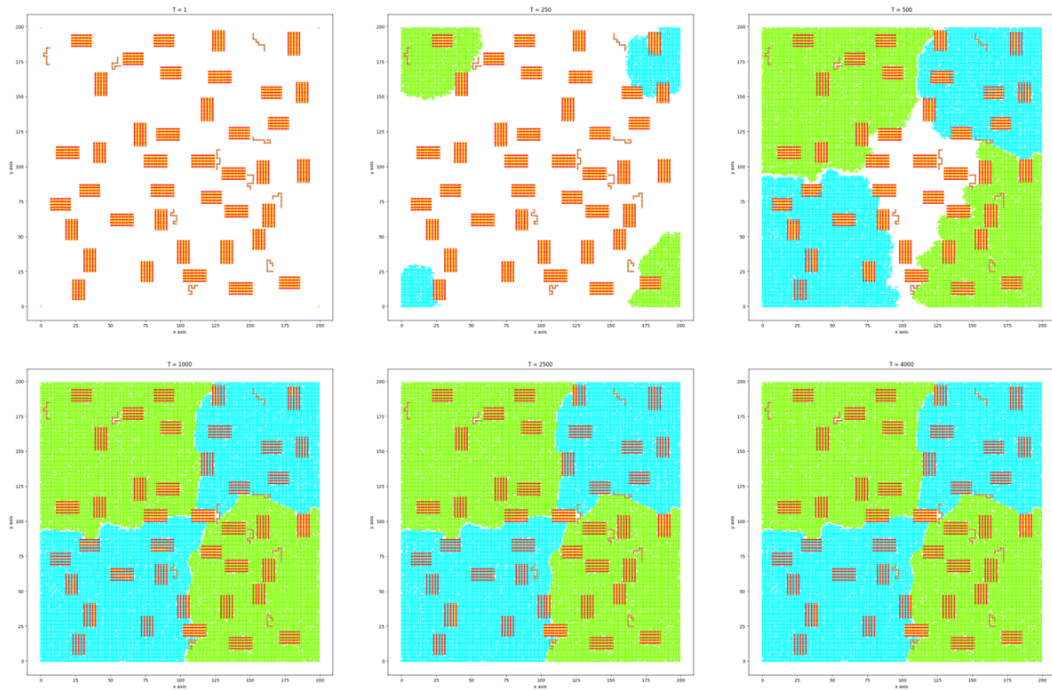

**Figure S2.** The simulation results of coal particles with layer number  $n=9$  under shear stresses at iteration number  $T$  of 1, 250, 1000, 1000, 2500, 4000, respectively.

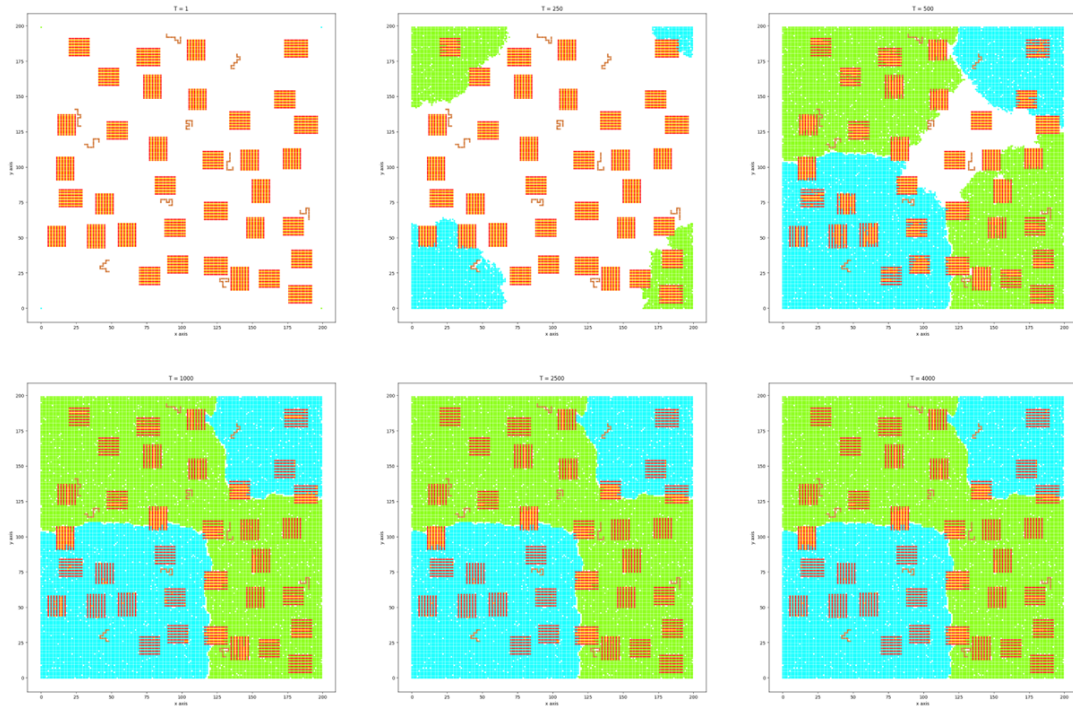

**Figure S3.** The simulation results of coal particles with layer number  $n=13$  under shear stresses at iteration number  $T$  of 1, 250, 1000, 1000, 2500, 4000, respectively.

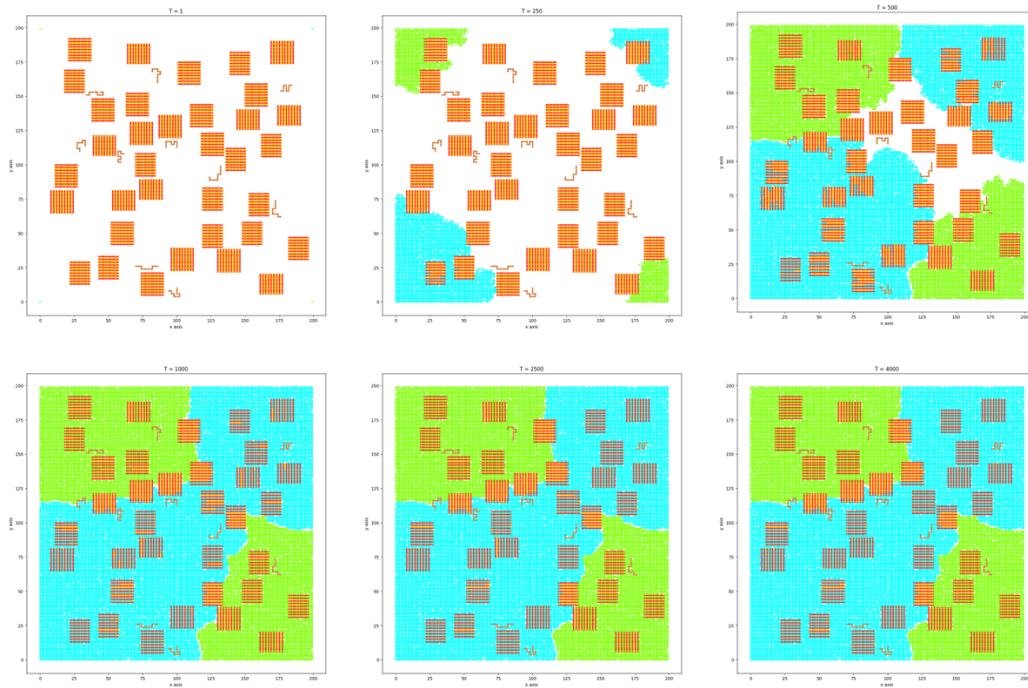

**Figure S4.** The simulation results of coal particles with layer number  $n=17$  under shear stresses at iteration number  $T$  of 1, 250, 1000, 1000, 2500, 4000, respectively.

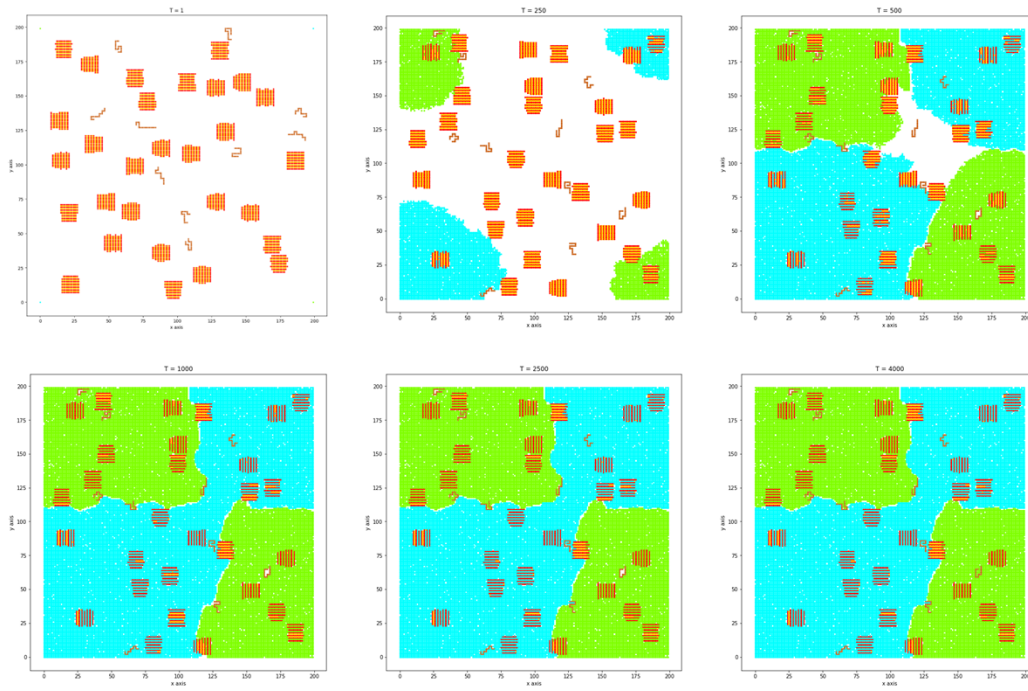

**Figure S5.** The simulation results of coal particles with lateral length  $L=12$  under shear stresses at iteration number  $T$  of 1, 250, 1000, 1000, 2500, 4000, respectively.

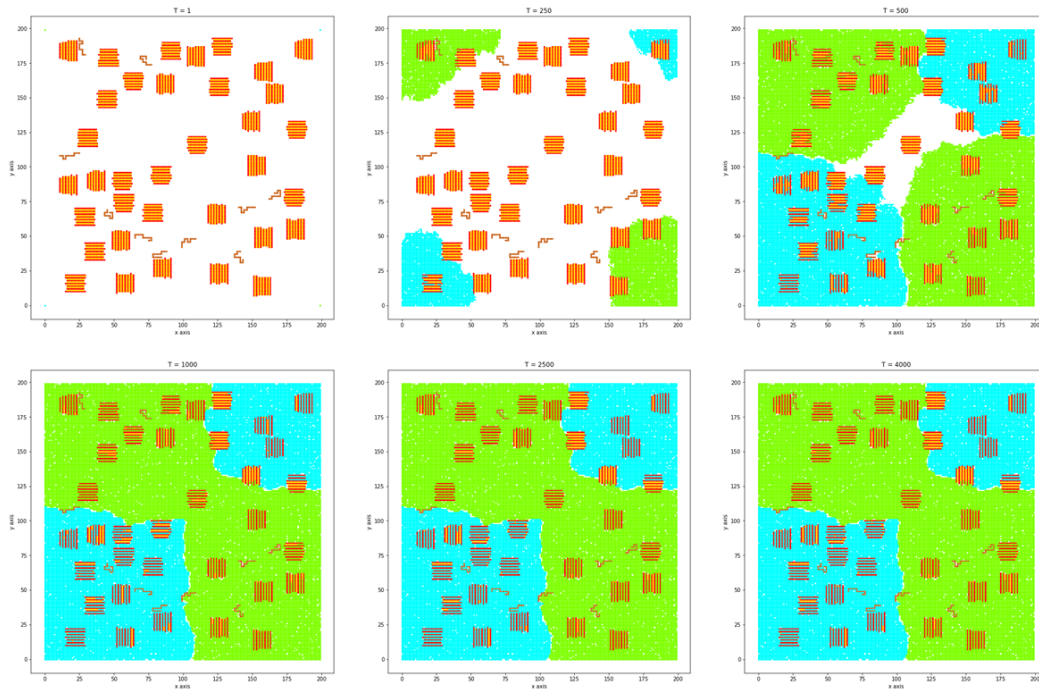

**Figure S6.** The simulation results of coal particles with lateral length  $L=14$  under shear stresses at iteration number  $T$  of 1, 250, 1000, 1000, 2500, 4000, respectively.



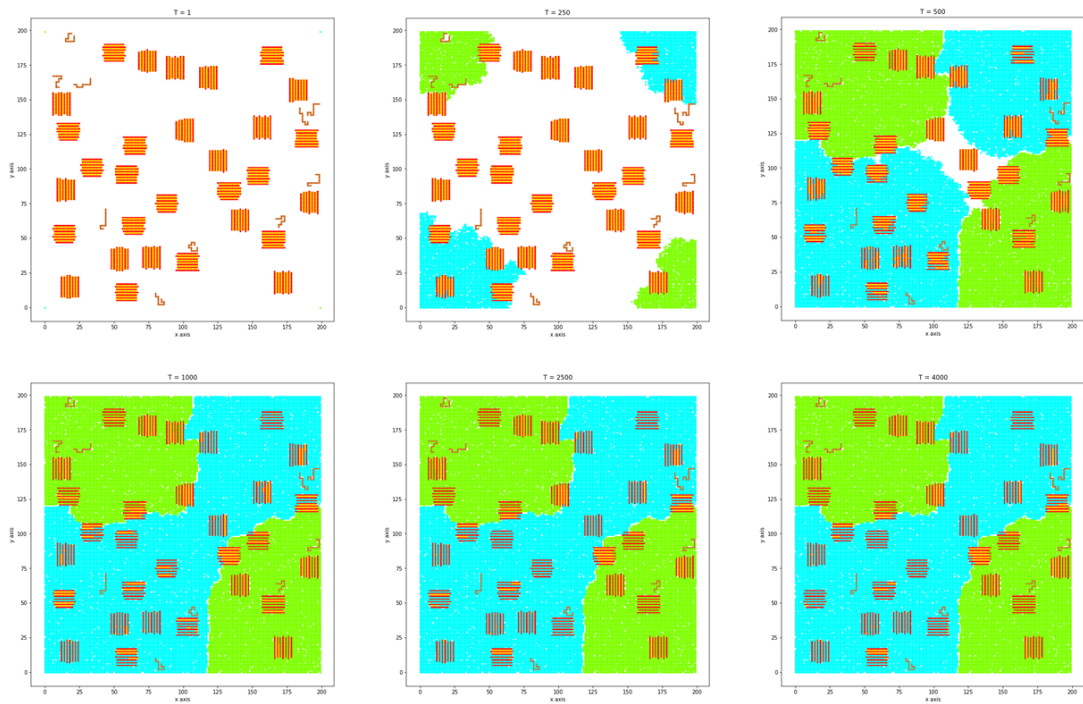

**Figure S7.** The simulation results of coal particles with lateral length  $L=16$  under shear stresses at iteration number  $T$  of 1, 250, 1000, 1000, 2500, 4000, respectively.



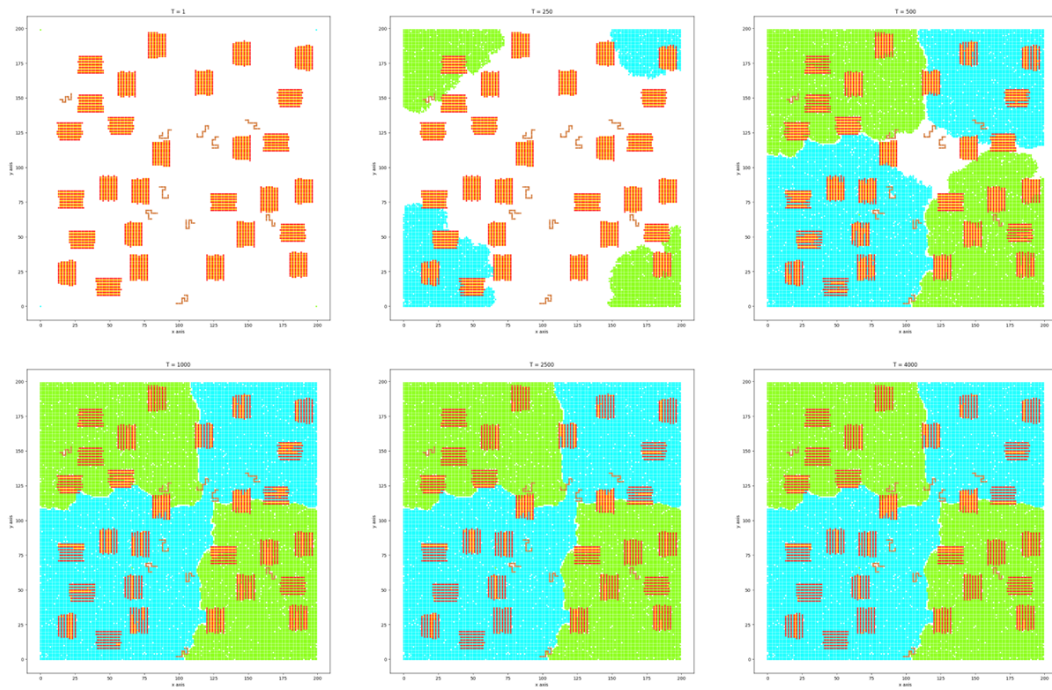

**Figure S8.** The simulation results of coal particles with lateral length  $L=18$  under shear stresses at iteration number  $T$  of 1, 250, 1000, 1000, 2500, 4000, respectively.
